# Supplementary material for: Comparative electronic structures of nitrogenase FeMoco and FeVco
Source: Royal Society of Chemistry journal article supplement (doi:10.1039/c7dt00128b), 2017-01-01
Supplement: c7dt00128b1.pdf [file c7dt00128b1.pdf]

Supplementary Information for

**Comparative Electronic Structures of Nitrogenase FeMoco and FeVco**

Julian A. Rees,<sup>a,b</sup> Ragnar Bjornsson,<sup>a,c</sup> Joanna K. Kowalska,<sup>a</sup> Frederico A. Lima,<sup>a,d</sup> Julia Schlesier,<sup>e</sup> Daniel Sippel,<sup>e</sup> Thomas Weyhermüller,<sup>a</sup> Oliver Einsle,<sup>e,\*</sup> Julie A. Kovacs<sup>b,\*</sup> and Serena DeBeer<sup>a,f,\*</sup>

<sup>a</sup>Max Planck Institute for Chemical Energy Conversion, Stiftstr. 34-36, 45470 Mülheim an der Ruhr, Germany, E-mail: [serena.debeer@cec.mpg.de](mailto:serena.debeer@cec.mpg.de); Tel:+49 208 306 3605

<sup>b</sup>Department of Chemistry, University of Washington, Box 351700, Seattle, WA 98195-1700, United States

<sup>c</sup>Science Institute, University of Iceland, Dunhagi 3, 107 Reykjavik, Iceland

<sup>d</sup>Centro Nacional de Pesquisa em Energia e Materiais Brazilian Synchrotron Light Laboratory - LNLS Rua Giuseppe Máximo Scolfaro, 10.000 13083-970 Campinas SP, Brazil

<sup>e</sup>Institute for Biochemistry and BIOS Centre for Biological Signalling Studies, Albert Ludwigs University Freiburg, Germany

<sup>f</sup>Department of Chemistry and Chemical Biology, Cornell University, Ithaca, NY 14853, United States

**List of Figures**

- S1 – K $\beta$  mainline XES spectra and first derivatives of Fe<sub>2</sub>O<sub>3</sub>
- S2 – Full spectral window of K $\alpha$  HERFD XAS spectra, with post-edge for normalization
- S3 – First derivatives of K $\alpha$  HERFD XAS spectra
- S4 – First derivatives of K $\beta$  mainline XES spectra
- S5 – DFT-calculated localized orbitals of cubane cluster models
- S6 – DFT-calculated localized orbitals of protein cofactors
- S7 – DFT-calculated XAS spectra of proteins with varying oxidation states of VFe P-cluster

**List of Tables**

- S1 – Activity of nitrogenase isozymes
- S2 – Energies of K $\beta$  mainline XES features
- S3 – Calculated spin populations and bonding analyses

**Optimized Coordinates**

[VFe<sub>3</sub>S<sub>4</sub>Cl<sub>3</sub>(DMF)<sub>3</sub>]<sup>-</sup>

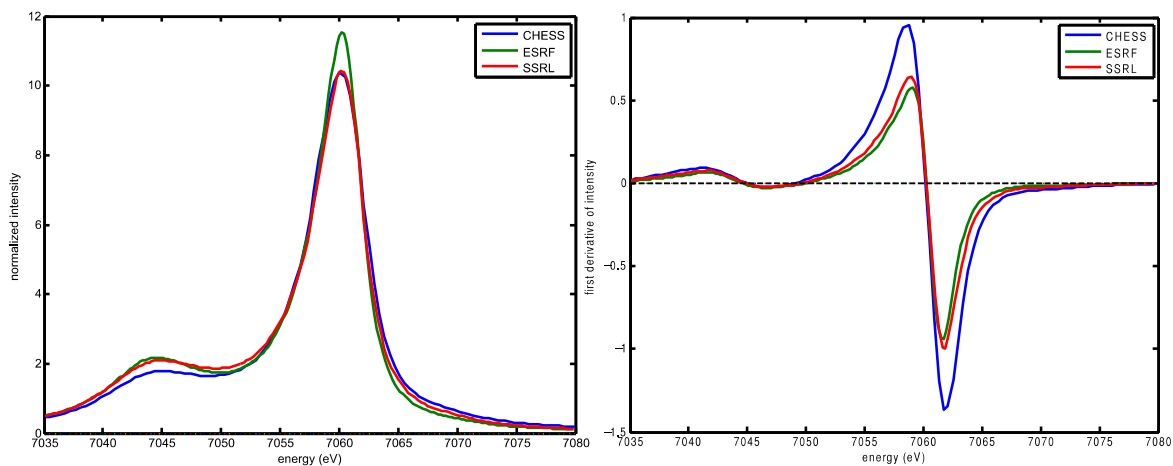

**Fig. S1** K $\beta$  mainline XES spectra (left) and first derivatives (right) of the Fe<sub>2</sub>O<sub>3</sub> calibrant from three different synchrotron beamlines, showing identical peak positions.

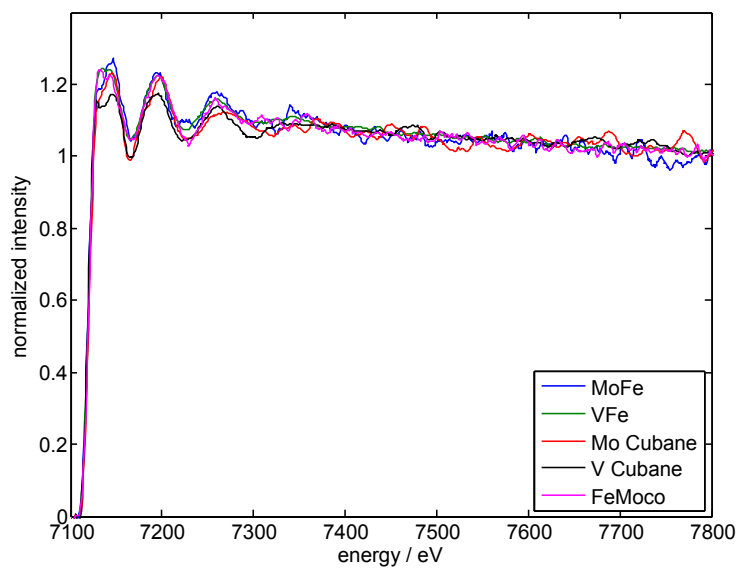

**Fig. S2** Fe K $\alpha$ -detected HERFD XAS spectra of the MoFe<sub>3</sub>S<sub>3</sub> and VFe<sub>3</sub>S<sub>4</sub> cubane clusters, MoFe, VFe, and FeMoco. The large spectral window includes the EXAFS region, which was normalized to a final intensity of 1.

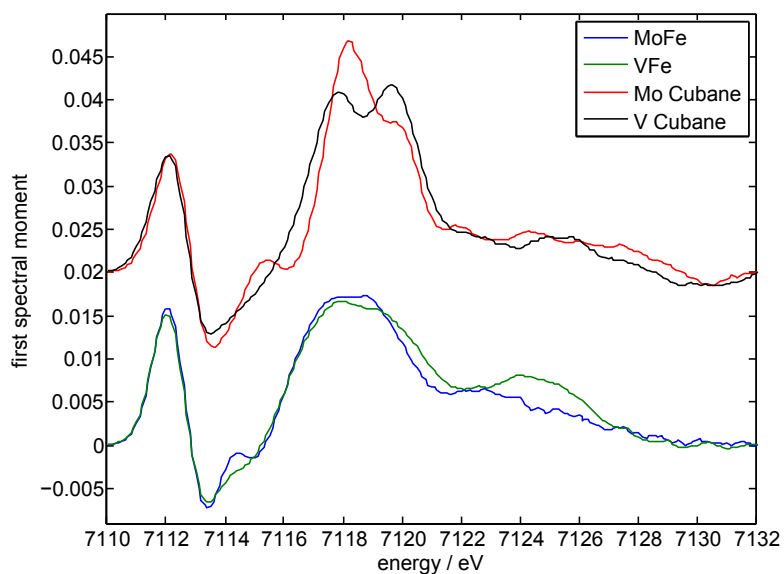

**Fig. S3** Smoothed first spectral moments of the Fe K $\alpha$ -detected HERFD XAS spectra of the MoFe<sub>3</sub>S<sub>3</sub> and VFe<sub>3</sub>S<sub>4</sub> cubane clusters, MoFe, and VFe. Cubane spectra have been vertically offset by 0.02.

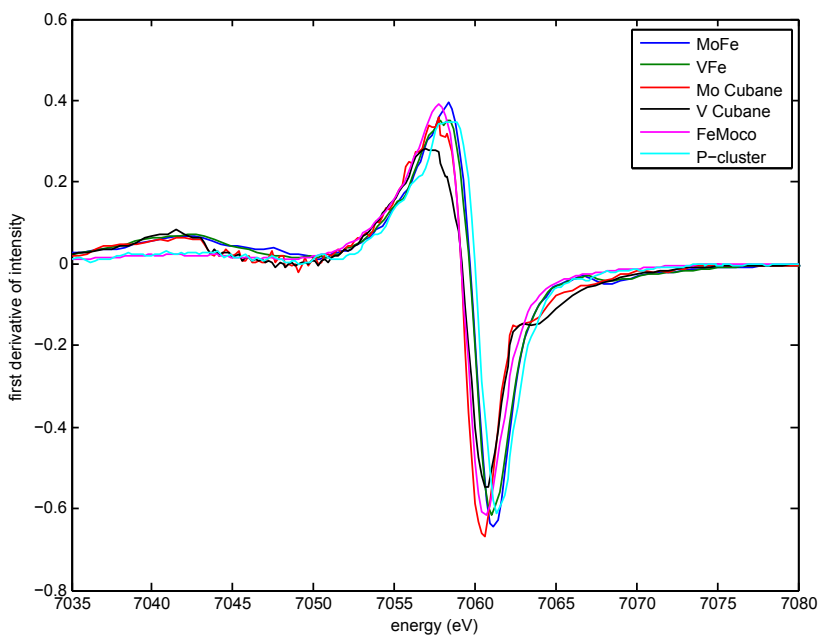

**Fig. S4** Smoothed first spectral moments of the mainline region of the Fe K $\beta$  XES spectra of the MoFe<sub>3</sub>S<sub>3</sub> and VFe<sub>3</sub>S<sub>4</sub> cubane clusters, MoFe, VFe, FeMoco, and the P-cluster-only MoFe variant.

Localized orbitals (BP86)  
[MoFe<sub>3</sub>S<sub>4</sub>]<sup>3+</sup> cubane

MO 114 alpha  
46.5 % Mo, 51%Fe

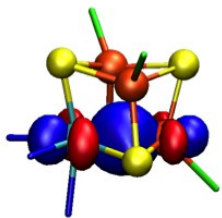

MO 112 beta  
53 %Mo, 43 %Fe

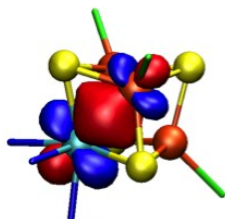

MO 113 beta  
53 %Mo, 43 %Fe

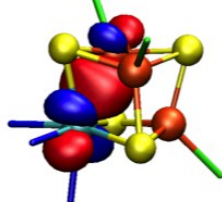

Localized orbitals (BP86)  
[VFe<sub>3</sub>S<sub>4</sub>]<sup>2+</sup> cubane

MO 106 alpha  
34 % V, 64%Fe

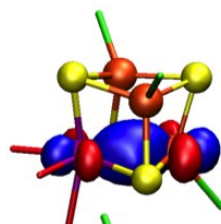

MO 103 beta  
60 % V, 36%Fe

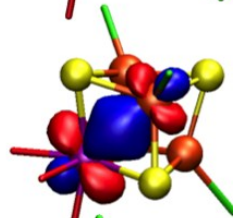

MO 104 beta  
61 % V, 35%Fe

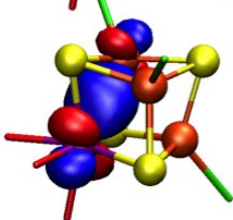

Fig. S5 Pipek-Mezey localized heterometallic bonding orbitals of the [MoFe<sub>3</sub>S<sub>4</sub>]<sup>3+</sup> and [VFe<sub>3</sub>S<sub>4</sub>]<sup>2+</sup> model cubanes

Localized orbitals (BP86)  
FeMoco

MO 295 alpha  
45 % Mo, 52%Fe

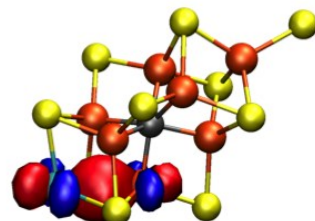

MO 292 beta  
48 % Mo, 49 %Fe

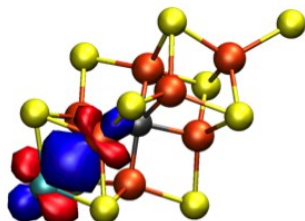

MO 293 beta  
53 %Mo, 44 %Fe

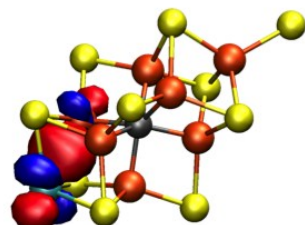

Localized orbitals (BP86)  
FeVco

MO 287 alpha  
35 % V, 62%Fe

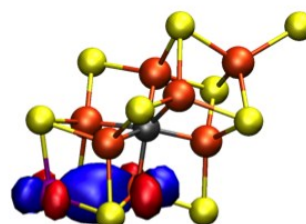

MO 282 beta  
51 % V, 45 %Fe

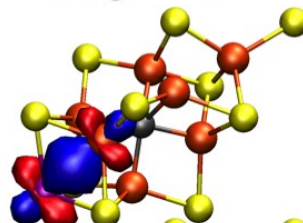

MO 283 beta  
61 % V, 34 %Fe

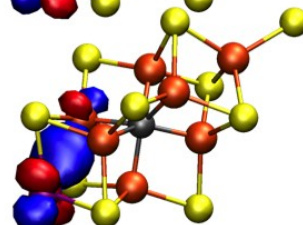

Fig. S6 Pipek-Mezey localized heterometallic bonding orbitals of FeMoco and FeVco

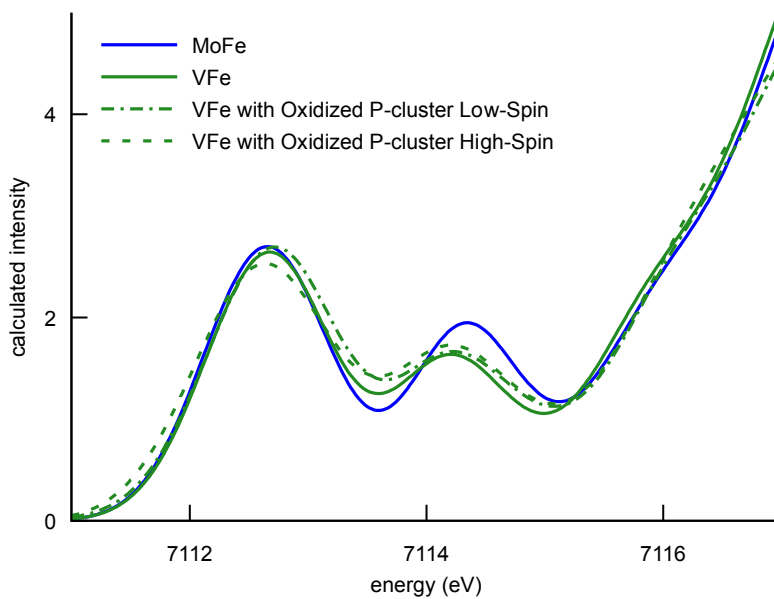

**Fig. S7** TD-DFT-calculated XAS spectra of MoFe, VFe, and VFe with a one-electron oxidized P-cluster. For both the high-spin ( $S = 5/2$ ) and low-spin ( $S = 1/2$ ) cases, the changes to the second pre-edge peak are small compared to the perturbation due to a changing heterometal (VFe to MoFe). Also, changes to the first pre-edge peak are expected, in contrast to the experimental data.

**Table S1** Literature values for enzyme activities of *A. vinelandii* molybdenum and vanadium nitrogenase. Values for usage and production during N<sub>2</sub> reduction are in molar equivalents per N<sub>2</sub>, and approximate activities for CO reduction are reported as molar equivalents per protein per minute.<sup>1-4</sup>

| N <sub>2</sub>                | Mo Nitrogenase | V Nitrogenase  |
|-------------------------------|----------------|----------------|
| MgATP Used                    | 16             | 40             |
| e <sup>-</sup> used           | 8              | 12             |
| H <sub>2</sub> produced       | 1              | 3 <sup>a</sup> |
| Activity                      | 1040           | 660            |
| TON                           | 2230           | 112            |
| CO (eq. / min)                |                |                |
| C <sub>2</sub> H <sub>4</sub> | 0.006          | 7.5            |
| C <sub>2</sub> H <sub>6</sub> | 0.001          | 2.5            |
| C <sub>3</sub> H <sub>8</sub> | 0.002          | 1.5            |

<sup>a</sup> It is noted that while this value has not been contradicted in the literature, a pressure-dependent study analogous to that of Simpson and Burris<sup>1</sup> has not been performed for the vanadium nitrogenase. Thus, we caution that this number is not as firmly established as the analogous H<sub>2</sub> production stoichiometry for the molybdenum isozyme.

**Table S2** Energies of the Kβ mainline XES spectral features as determined from the first spectral moments. The Fe<sub>2</sub>S<sub>2</sub> complexes were previously reported.<sup>5</sup>

|                                          | Kβ'    | Kβ <sub>1,3</sub> | ΔE <sub>main</sub> |
|------------------------------------------|--------|-------------------|--------------------|
| Mo Cubane                                | 7048.0 | 7058.1            | 10.1               |
| V Cubane                                 | 7048.0 | 7058.2            | 10.2               |
| MoFe                                     | 7050.2 | 7059.7            | 9.5                |
| VFe                                      | 7050.2 | 7059.7            | 9.5                |
| FeMoco                                   | 7049.0 | 7058.1            | 9.1                |
| P-cluster                                | 7049.0 | 7060.0            | 11                 |
| Fe <sub>2</sub> S <sub>2</sub> Complexes |        |                   |                    |
| Fe(III) <sub>2</sub>                     |        |                   | 13.4               |
| Fe(II,III)                               |        |                   | 13.4               |
| Fe(II) <sub>2</sub>                      |        |                   | 13.4               |

**Table S3** Mulliken spin population and Mayer bond order analyses from the DFT calculations (BP86) for Mo and V cubanes, FeMoco, and FeVco

| Cubane Cluster Models                             |       |                                                  |       | Protein Cofactors                                  |       |                                                   |       |
|---------------------------------------------------|-------|--------------------------------------------------|-------|----------------------------------------------------|-------|---------------------------------------------------|-------|
| [MoFe <sub>3</sub> S <sub>4</sub> ] <sup>3+</sup> |       | [VFe <sub>3</sub> S <sub>4</sub> ] <sup>2+</sup> |       | [MoFe <sub>7</sub> S <sub>9</sub> C] <sup>1-</sup> |       | [VFe <sub>7</sub> S <sub>9</sub> C] <sup>2-</sup> |       |
| Mulliken spin populations                         |       |                                                  |       | Mulliken spin populations                          |       |                                                   |       |
| Mo                                                | -0.22 | V                                                | -0.82 | Mo                                                 | -0.13 | V                                                 | -0.68 |
| Fe1                                               | -2.78 | Fe1                                              | -3.04 | Fe1                                                | +3.02 | Fe1                                               | +3.12 |
| Fe2                                               | +2.82 | Fe2                                              | +3.14 | Fe2                                                | +2.72 | Fe2                                               | +2.84 |
| Fe3                                               | +2.82 | Fe3                                              | +3.14 | Fe3                                                | -2.47 | Fe3                                               | -2.70 |
|                                                   |       |                                                  |       | Fe4                                                | -2.35 | Fe4                                               | -2.61 |
|                                                   |       |                                                  |       | Fe5                                                | -2.31 | Fe5                                               | -2.59 |
|                                                   |       |                                                  |       | Fe6                                                | +1.97 | Fe6                                               | +2.41 |
|                                                   |       |                                                  |       | Fe7                                                | +2.00 | Fe7                                               | +2.53 |
| Mayer bond orders                                 |       |                                                  |       | Mayer bond orders                                  |       |                                                   |       |
| Mo – Fe1                                          | 0.486 | V – Fe1                                          | 0.447 | Mo – Fe5                                           | 0.490 | V – Fe5                                           | 0.448 |
| Mo – Fe2                                          | 0.514 | V – Fe2                                          | 0.480 | Mo – Fe6                                           | 0.537 | V – Fe6                                           | 0.470 |
| Mo – Fe3                                          | 0.415 | V – Fe3                                          | 0.480 | Mo – Fe7                                           | 0.497 | V – Fe7                                           | 0.393 |

## Optimized Coordinates

The DFT-optimized coordinates for the 225-atom model of MoFe, the P-cluster, and the Mo cubane cluster are available in the SI from Bjornsson et al.<sup>6</sup> The optimized coordinates of the 225-atom model of VFe can found in the SI of Rees et al.<sup>7</sup> The optimized coordinates for the  $[\text{VFe}_3\text{S}_4\text{Cl}_3(\text{DMF})_3]^-$  V cubane cluster are below:

|    |           |           |           |
|----|-----------|-----------|-----------|
| V  | 9.455748  | -0.457301 | 2.149351  |
| Fe | 10.940228 | 1.743053  | 2.551326  |
| Fe | 8.472185  | 1.628859  | 3.415400  |
| Fe | 8.953574  | 1.772873  | 0.845867  |
| S  | 10.161632 | 0.401666  | 4.165883  |
| S  | 7.381389  | 0.447276  | 1.810355  |
| S  | 9.486292  | 3.383944  | 2.369049  |
| S  | 10.823996 | 0.600084  | 0.628039  |
| Cl | 13.096822 | 2.134259  | 2.978258  |
| Cl | 6.977963  | 2.042243  | 5.043279  |
| Cl | 8.142751  | 2.397494  | -1.154520 |
| O  | 11.021112 | -1.942063 | 2.360513  |
| C  | 12.206772 | -1.623855 | 2.598005  |
| N  | 13.201656 | -2.511631 | 2.730035  |
| C  | 14.558584 | -2.062890 | 3.006218  |
| C  | 12.964020 | -3.941399 | 2.601853  |
| O  | 8.474392  | -2.026464 | 3.270923  |
| C  | 7.640625  | -1.756550 | 4.164332  |
| N  | 7.020540  | -2.683321 | 4.905457  |
| C  | 6.065605  | -2.288701 | 5.931132  |
| C  | 7.276897  | -4.103357 | 4.716967  |
| O  | 8.981109  | -1.877049 | 0.585783  |
| C  | 8.522405  | -1.495402 | -0.514198 |
| N  | 8.234212  | -2.323632 | -1.525993 |
| C  | 7.708239  | -1.801358 | -2.779074 |
| C  | 8.437701  | -3.760153 | -1.413397 |
| H  | 12.518174 | -0.572355 | 2.716921  |
| H  | 15.237580 | -2.383329 | 2.201714  |
| H  | 14.913798 | -2.484530 | 3.958560  |
| H  | 14.570943 | -0.968058 | 3.071453  |
| H  | 13.566727 | -4.351644 | 1.777721  |
| H  | 13.243435 | -4.455463 | 3.533741  |
| H  | 11.900176 | -4.098181 | 2.396590  |
| H  | 7.359609  | -0.717591 | 4.405493  |
| H  | 6.398843  | -2.643058 | 6.918075  |
| H  | 5.986974  | -1.194902 | 5.950158  |
| H  | 5.075501  | -2.717736 | 5.715817  |
| H  | 7.662897  | -4.543201 | 5.648657  |
| H  | 8.016663  | -4.219501 | 3.918424  |
| H  | 6.346191  | -4.621082 | 4.440633  |
| H  | 8.324720  | -0.431178 | -0.725804 |
| H  | 6.717396  | -2.232730 | -2.986029 |
| H  | 7.617728  | -0.710745 | -2.706587 |
| H  | 8.384911  | -2.052041 | -3.609729 |
| H  | 7.483644  | -4.288390 | -1.559258 |
| H  | 8.833164  | -3.977721 | -0.416061 |
| H  | 9.150952  | -4.100827 | -2.178792 |

- (1) Simpson, F. B.; Burris, R. H. *Sci. (New York, NY)* **1984**, *224*, 1095–1097.
- (2) Burgess, B. K. *Chem. Rev.* **1990**, *90*, 1377–1406.
- (3) Lee, C. C.; Hu, Y.; Ribbe, M. W. *Science* **2010**, *329*, 642.
- (4) Hu, Y.; Lee, C. C.; Ribbe, M. W. *Science* **2011**, *333*, 753–755.
- (5) Kowalska, J. K.; Hahn, A. W.; Albers, A.; Schiewer, C. E.; Bjornsson, R.; Lima, F. A.; Meyer, F.; DeBeer, S. *Inorg. Chem.* **2016**, *55*, 4485–4497.
- (6) Bjornsson, R.; Lima, F. A.; Spatzal, T.; Weyhermüller, T.; Glatzel, P.; Bill, E.; Einsle, O.; Neese, F.; DeBeer, S. *Chem. Sci.* **2014**, *5*, 3096–3103.
- (7) Rees, J. A.; Bjornsson, R.; Schlesier, J.; Sippel, D.; Einsle, O.; DeBeer, S. *Angew. Chemie Int. Ed.* **2015**, *54*, 13249–13252.
